# Supplementary material
Source: Springer Nature journal article supplement (https://www.springermedizin.de/resource/supplementary/12879_2011_2106_MOESM1_ESM.pdf/9443598)
Supplement: MOESM1 [file 9443598]

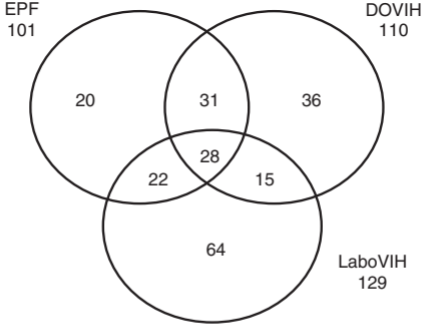

DOVIH: Mandatory HIV case reporting

EPF: ANRS-French Perinatal Survey

LaboVIH: Laboratory surveillance of HIV testing activity
